# Supplementary material for: Accelerating charge transfer for Ni(OH)2 through chlorine-anion decoration in the urea electrooxidation reaction
Source: Royal Society of Chemistry journal article supplement (doi:10.1039/d3nj00964e), 2023-01-01
Supplement: d3nj00964e1.pdf [file d3nj00964e1.pdf]

## Supporting Information

### **Accelerating charge transfer for Ni(OH)<sub>2</sub> through chlorine-anion decoration in urea electrooxidation reaction**

Yongjie Zhao,<sup>a</sup> Xiujuan Sun,<sup>\*a</sup> Quhan Cao,<sup>a</sup> Jiajia Zhou<sup>a</sup>, Wenjuan Tan,<sup>a</sup> Piao Zhu,<sup>a</sup>  
Enhui Liu,<sup>a</sup> Rui Ding,<sup>a</sup> Ping Gao<sup>a</sup> and Weiwei Lin,<sup>\*b</sup>

<sup>a</sup> *Key Laboratory of Environmentally Friendly Chemistry and Applications of Ministry of Education, College of Chemistry, Xiangtan University, Hunan 411105, China.*

<sup>b</sup> *Anhui Laboratory of Functional Coordinated Complexes for Materials Chemistry and Application, Anhui Laboratory of Clean Catalytic Engineering, School of chemical and environmental Engineering, Anhui Polytechnic University, Wuhu, 241000, China.*

*Corresponding authors E-mails: sunxj594@xtu.edu.cn ; linweiwei@ahpu.edu.cn.*

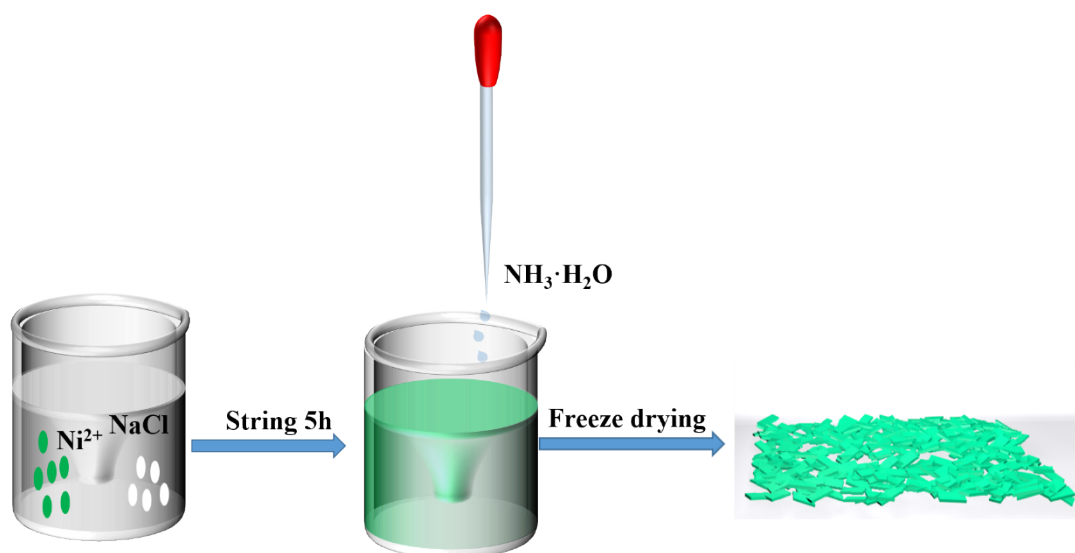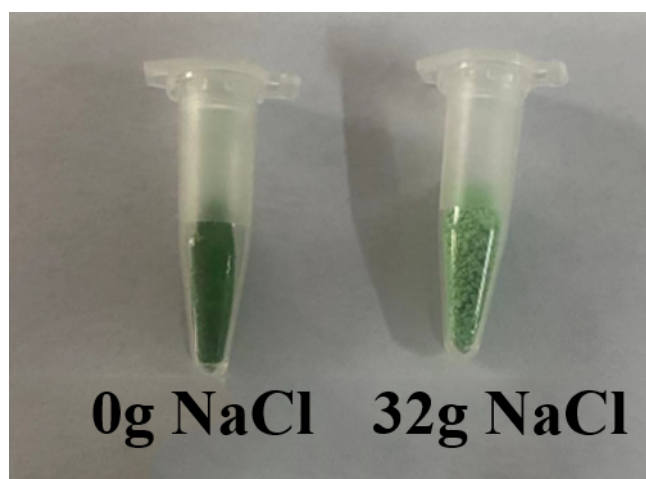

**Fig. S1** Schematic diagram of the preparation process for the  $\text{Cl}_{32}\text{-Ni(OH)}_2$  nanosheets and pictures of  $\text{Ni(OH)}_2$  and  $\text{Cl}_{32}\text{-Ni(OH)}_2$ .

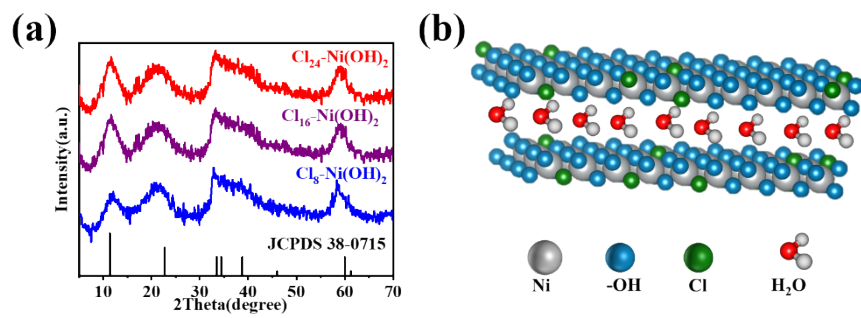

**Fig. S2** (a) XRD patterns of  $\text{Cl}_8\text{-Ni(OH)}_2$ ,  $\text{Cl}_{16}\text{-Ni(OH)}_2$ ,  $\text{Cl}_{24}\text{-Ni(OH)}_2$ . (b) Cl-replaced partial OH- and the  $\text{H}_2\text{O}$  located between two  $\text{Cl-Ni(OH)}_2$  layers

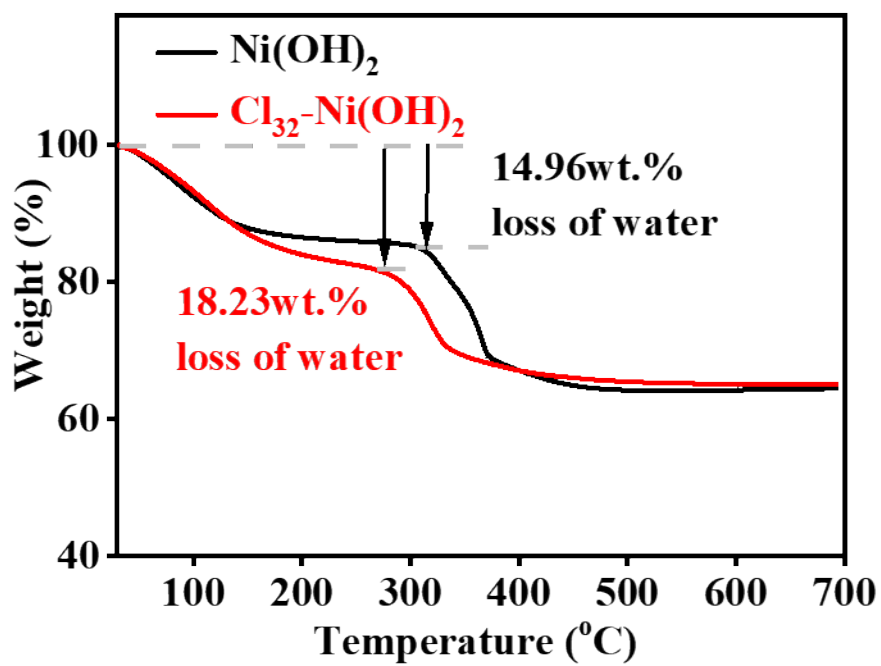

**Fig. S3** Thermogravimetric curves of  $\text{Ni(OH)}_2$  and  $\text{Cl}_{32}\text{-Ni(OH)}_2$ .

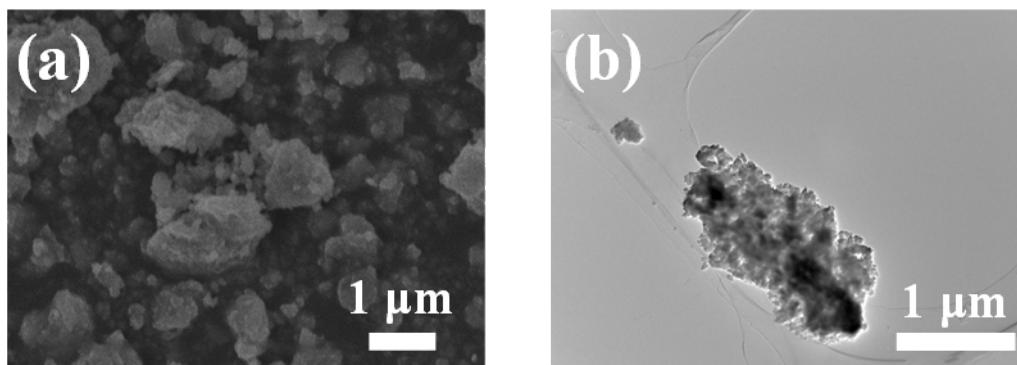

**Fig. S4** (a) SEM and (b) TEM images of  $\text{Ni}(\text{OH})_2$ .

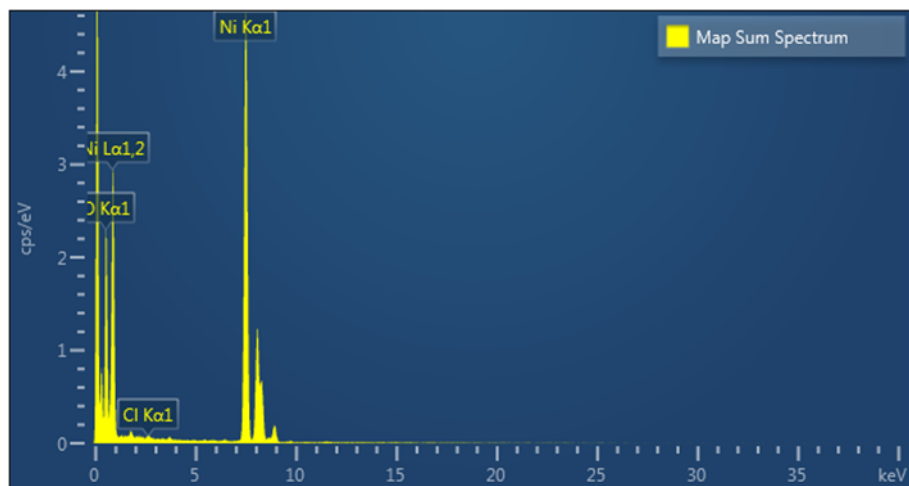

**Fig. S5** EDX of Ni, O and Cl of  $\text{Cl}_{32}\text{-Ni(OH)}_2$ .

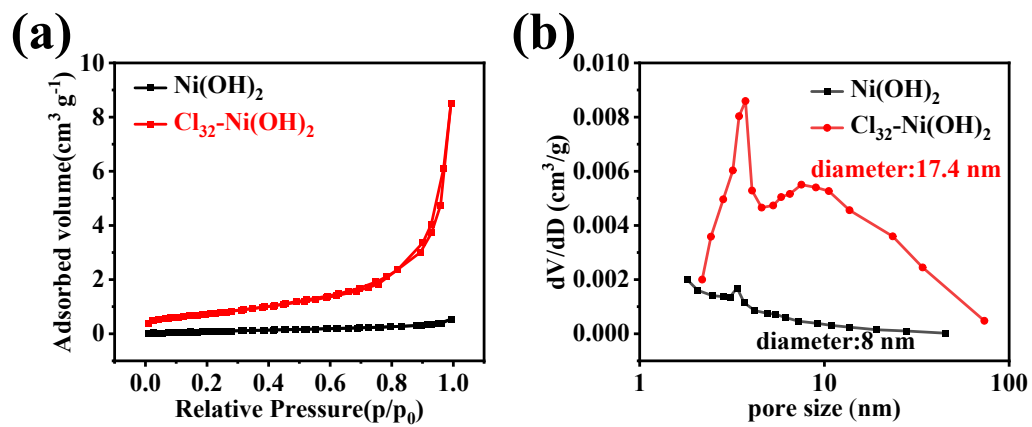

**Fig. S6** a)  $\text{N}_2$  adsorption-desorption isotherms and b) pore-size distributions of  $\text{Ni(OH)}_2$  and  $\text{Cl}_{32}\text{-Ni(OH)}_2$ .

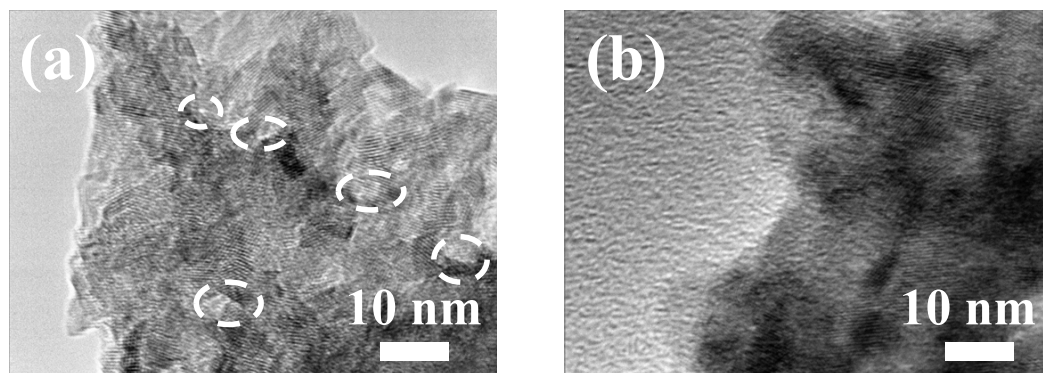

**Fig. S7** HRTEM image of the (a) Cl<sub>32</sub>-Ni(OH)<sub>2</sub> and (b) Ni(OH)<sub>2</sub>.



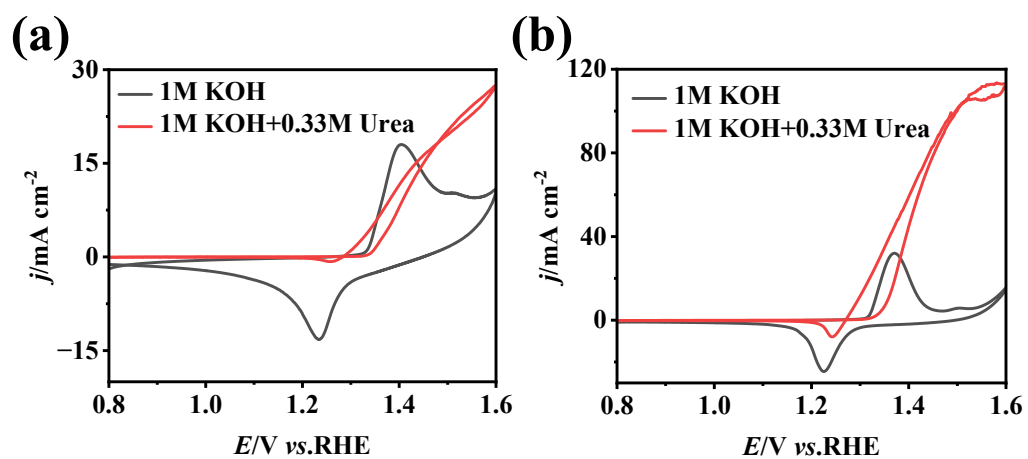

**Fig. S8** Cyclic voltammograms of (a) Ni(OH)<sub>2</sub> and (b) Cl<sub>32</sub>-Ni(OH)<sub>2</sub> electrocatalysts in 1.0 M KOH with/without 0.33 M urea solution.

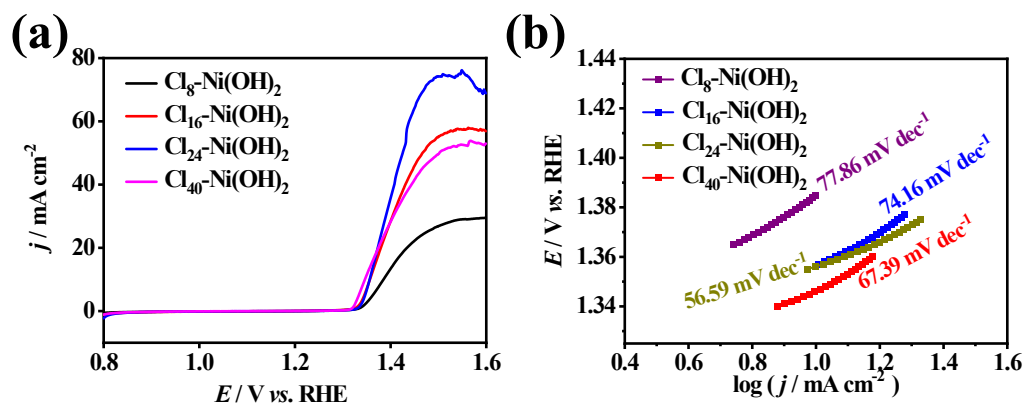

**Fig. S9** The UOR performance of  $\text{Ni(OH)}_2$ ,  $\text{Cl}_8\text{-Ni(OH)}_2$ ,  $\text{Cl}_{16}\text{-Ni(OH)}_2$ ,  $\text{Cl}_{24}\text{-Ni(OH)}_2$ ,  $\text{Cl}_{40}\text{-Ni(OH)}_2$  (a) Polarization curves of different catalysts. (b) The Tafel slopes.

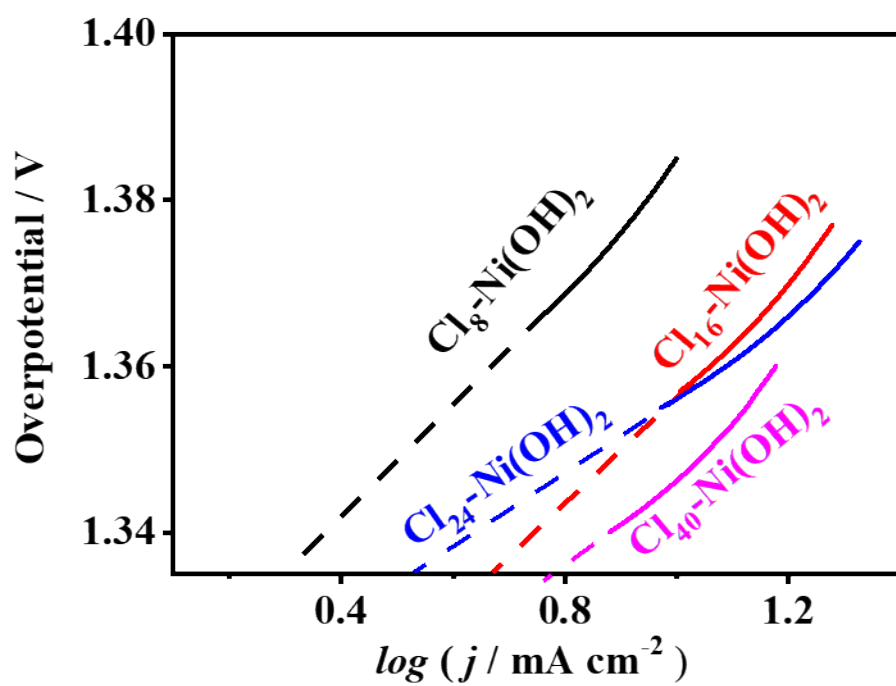

**Fig. S10** Tafel plots of Cl<sub>8</sub>-Ni(OH)<sub>2</sub>, Cl<sub>16</sub>-Ni(OH)<sub>2</sub>, Cl<sub>24</sub>-Ni(OH)<sub>2</sub> and Cl<sub>40</sub>-Ni(OH)<sub>2</sub> to calculate the exchange current density.

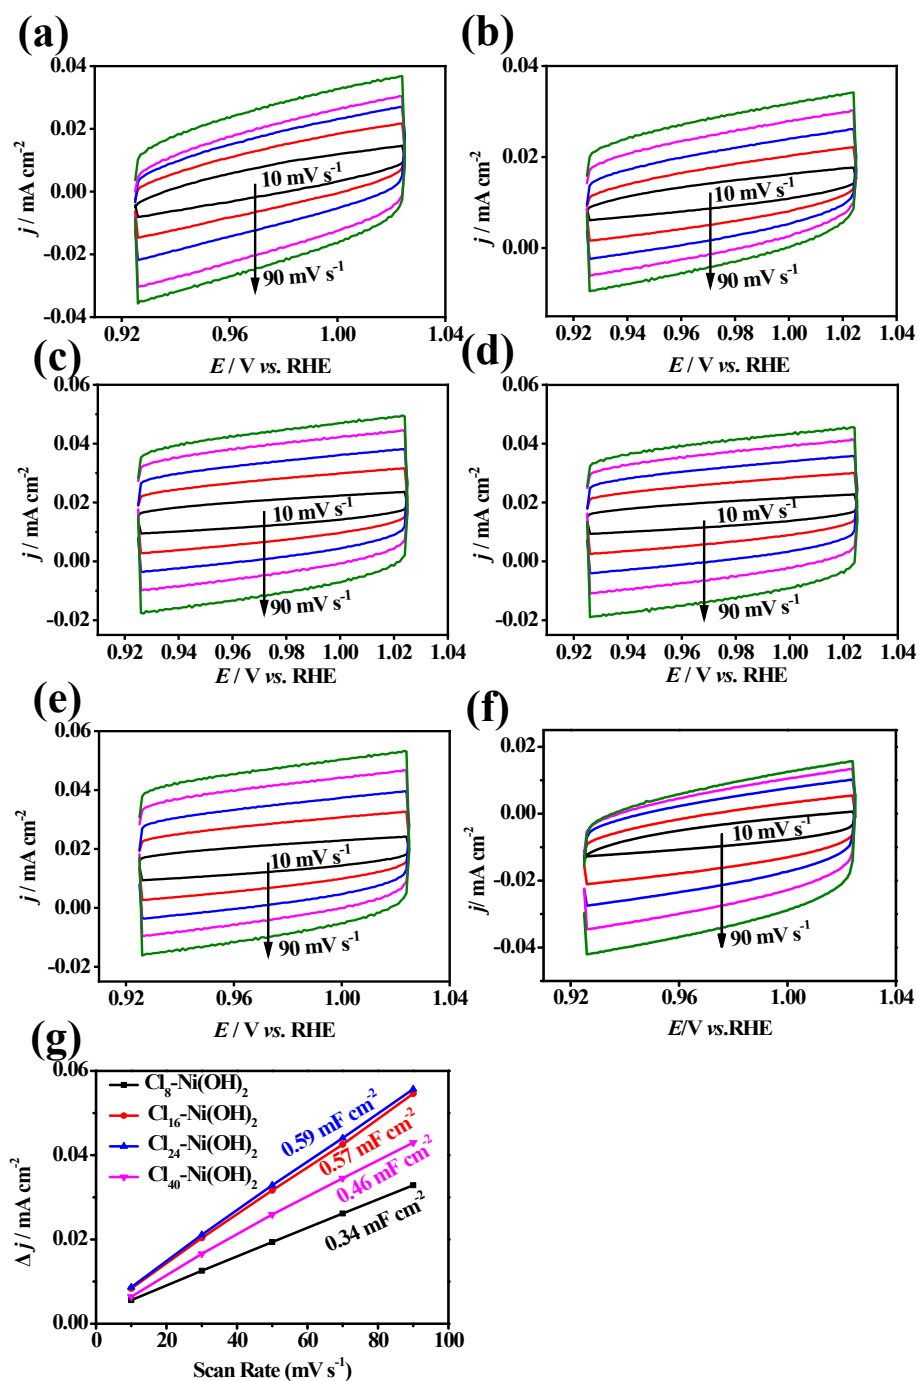

**Fig. S11** Cyclic voltammograms (CV) of (a) Ni(OH)<sub>2</sub>, (b) Cl<sub>8</sub>-Ni(OH)<sub>2</sub>, (c) Cl<sub>16</sub>-Ni(OH)<sub>2</sub>, (d) Cl<sub>24</sub>-Ni(OH)<sub>2</sub>, (e) Cl<sub>32</sub>-Ni(OH)<sub>2</sub>, (f) Cl<sub>40</sub>-Ni(OH)<sub>2</sub> at different scan rates of 10, 30, 50, 70, and 90 mV s<sup>-1</sup> in 1 M KOH solution for  $C_{dl}$  testing at non-faradic reaction potential region for UOR. (g) The charging current density differences are plotted against the scan rates of the as-prepared catalysts. The linear slope is equivalent to twice of electrochemical double-layer capacitance ( $C_{dl}$ ).

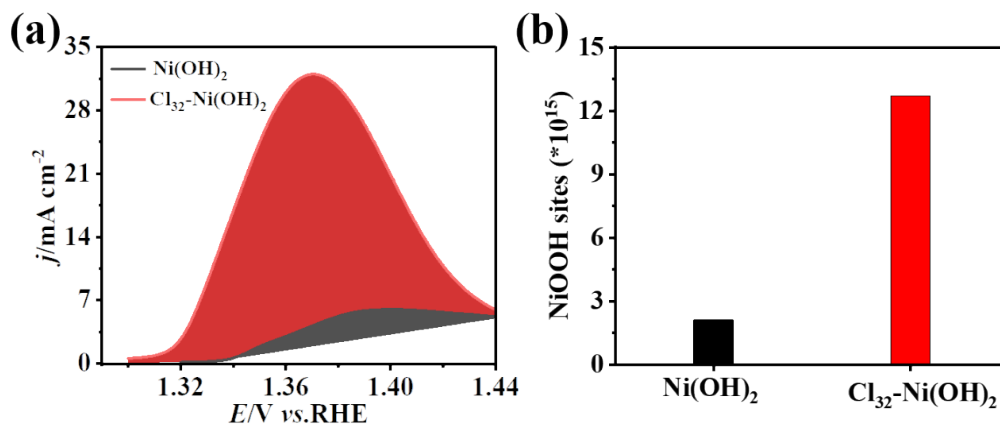

**Fig. S12.** (a) Oxidation peak areas, (b) The values of active sites

Due to the single-electron transfer process for the formation of NiOOH, the number of the active catalytic site can be derived from the area under the oxidation peak. The charge associated with the generated NiOOH is evaluated from Eq. (1).

$$\text{Charge associated with NiOOH formation} = \frac{\text{NiOOH peak area}}{\text{scan rate}}$$

The oxidation peak of Cl<sub>32</sub>-Ni(OH)<sub>2</sub> shows a peak area of 2.04×10<sup>-5</sup> A V with 2.04×10<sup>-3</sup> C of charge associated with the NiOOH formation. Similarly, Ni(OH)<sub>2</sub> show 0.34×10<sup>-3</sup> C of charge associated with single-electron oxidation of Ni<sup>2+</sup> to NiOOH. The total number of active sites form on the electrocatalytic surface can be derived from the following Eq. (2).

$$N = \frac{\text{charge associated with oxidation peak}}{A \times \text{charge of electron}}$$

where N is the number of active sites, and A is the number of electrons transferred for the respective oxidation process.

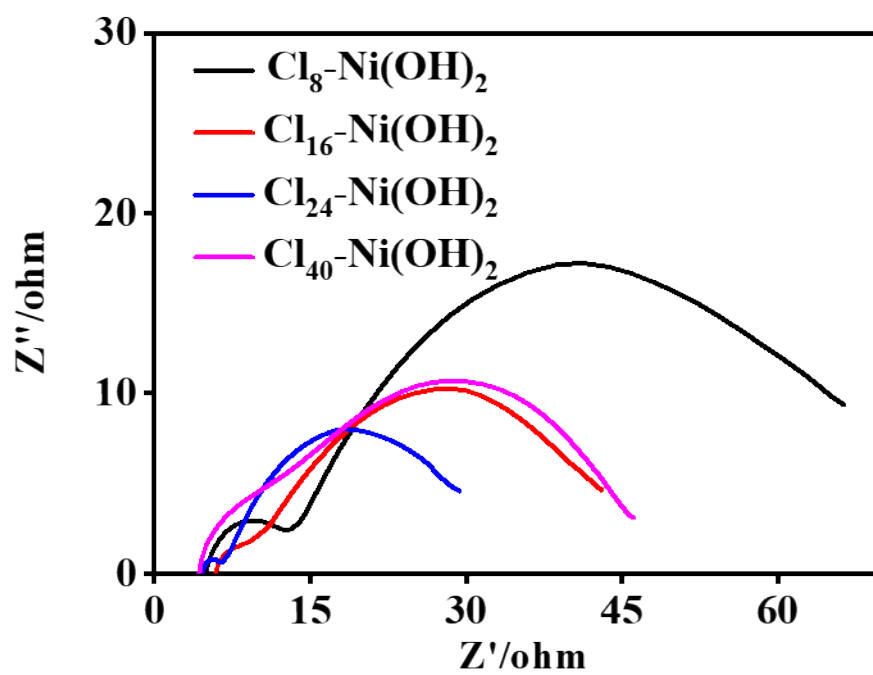

**Fig. S13** Nyquist plots of the  $\text{Cl}_8\text{-Ni(OH)}_2$ ,  $\text{Cl}_{16}\text{-Ni(OH)}_2$ ,  $\text{Cl}_{24}\text{-Ni(OH)}_2$ , and  $\text{Cl}_{40}\text{-Ni(OH)}_2$ .

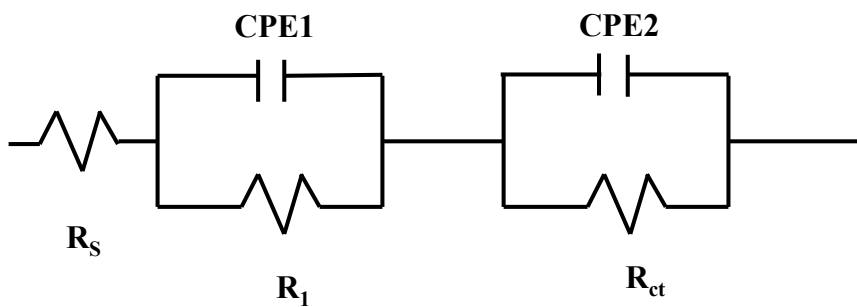

**Fig. S14** The equivalent circuit model of EIS analysis.

The  $R_s$  is the uncompensated solution resistance. The  $R_{ct}$  at low frequency represents the charge transfer resistance and the value of  $R_1$  at high frequency is denoted as the electrode surface contact resistance.

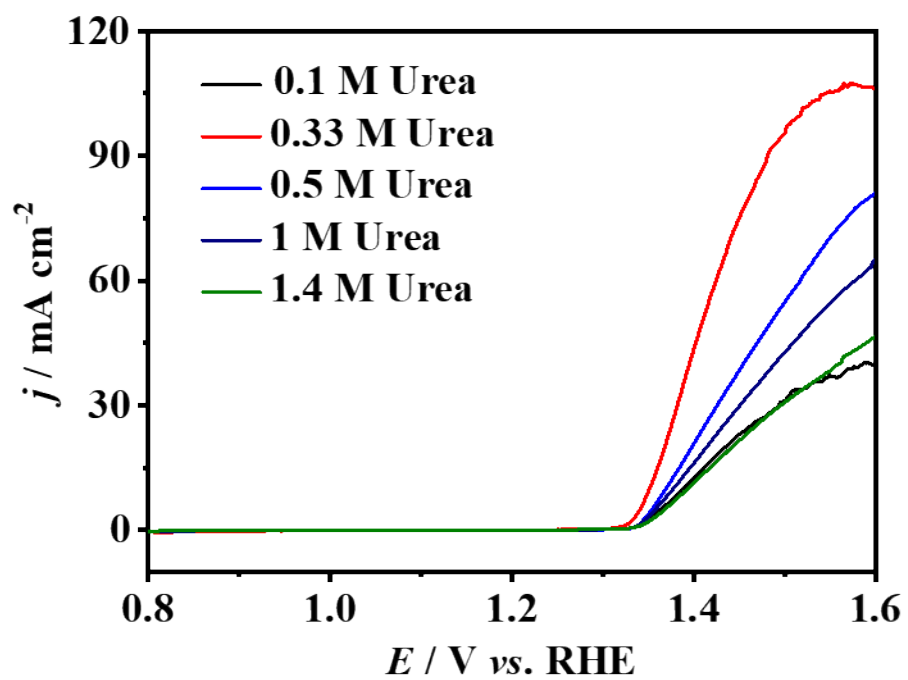

**Fig. S15** The UOR performance of  $\text{Cl}_{32}\text{-Ni}(\text{OH})_2$  catalyst (a) in 1.0 M KOH with various urea concentrations.



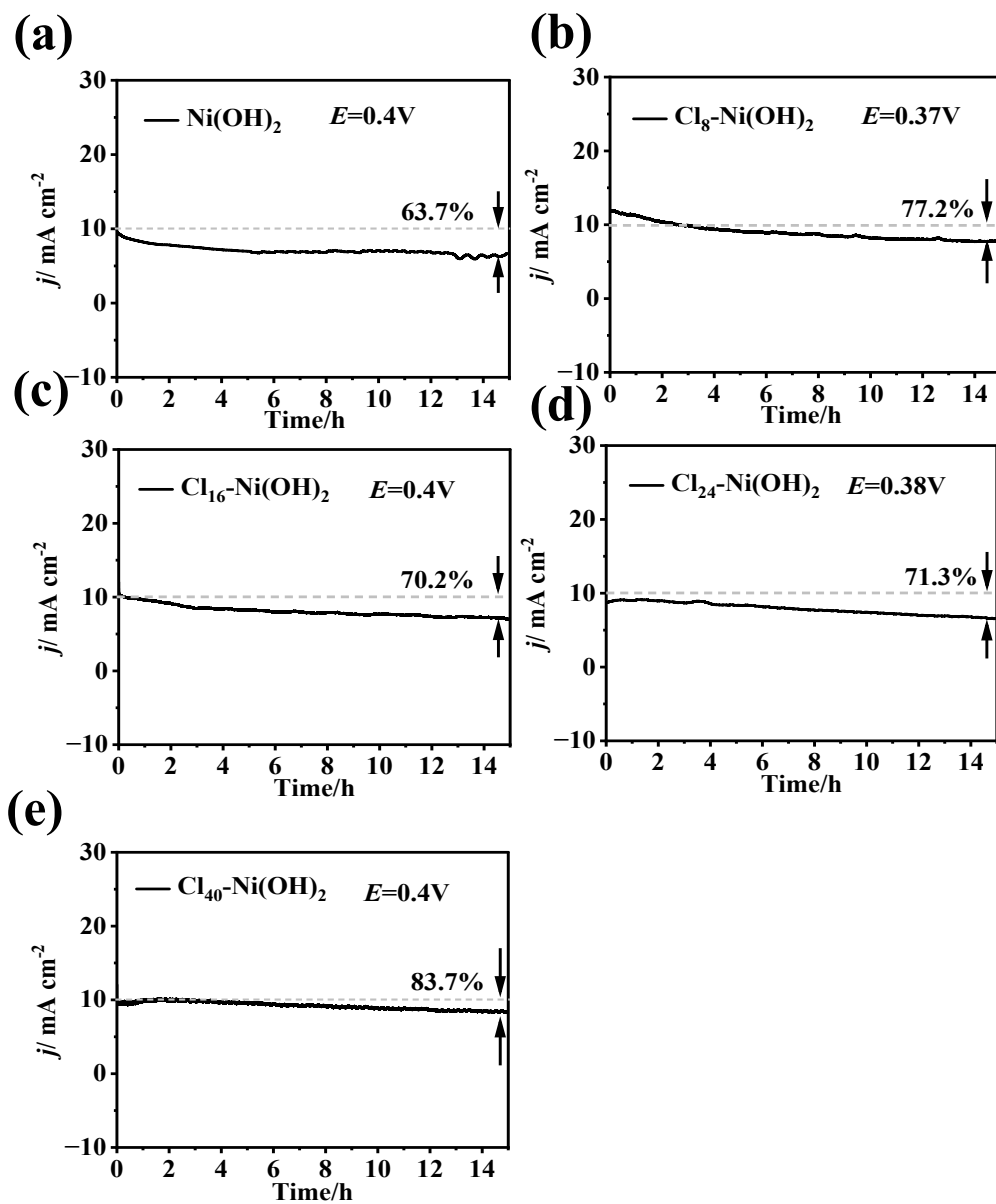

**Fig. S16** Chronoamperometry test of  $\text{Ni(OH)}_2$ ,  $\text{Cl}_8\text{-Ni(OH)}_2$ ,  $\text{Cl}_{16}\text{-Ni(OH)}_2$ ,  $\text{Cl}_{24}\text{-Ni(OH)}_2$  and  $\text{Cl}_{40}\text{-Ni(OH)}_2$  measured for 15 h.

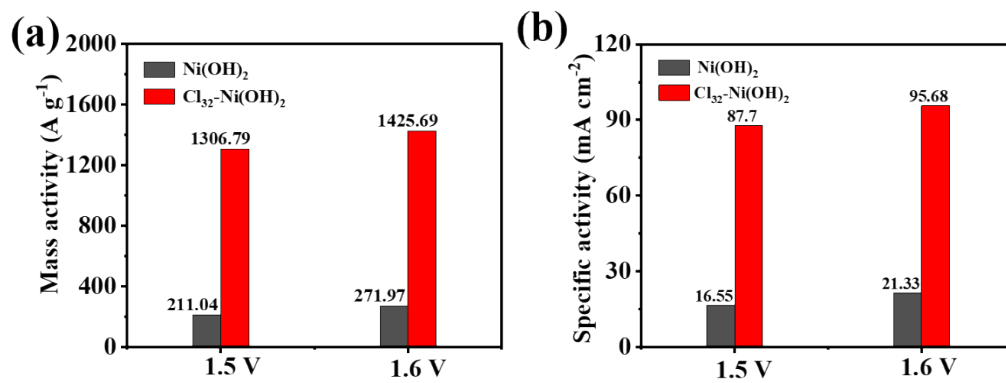

**Fig.S17.** The mass activities (a) and specific activities (b) of  $\text{Cl}_{32}\text{-Ni(OH)}_2$  and  $\text{Ni(OH)}_2$ .

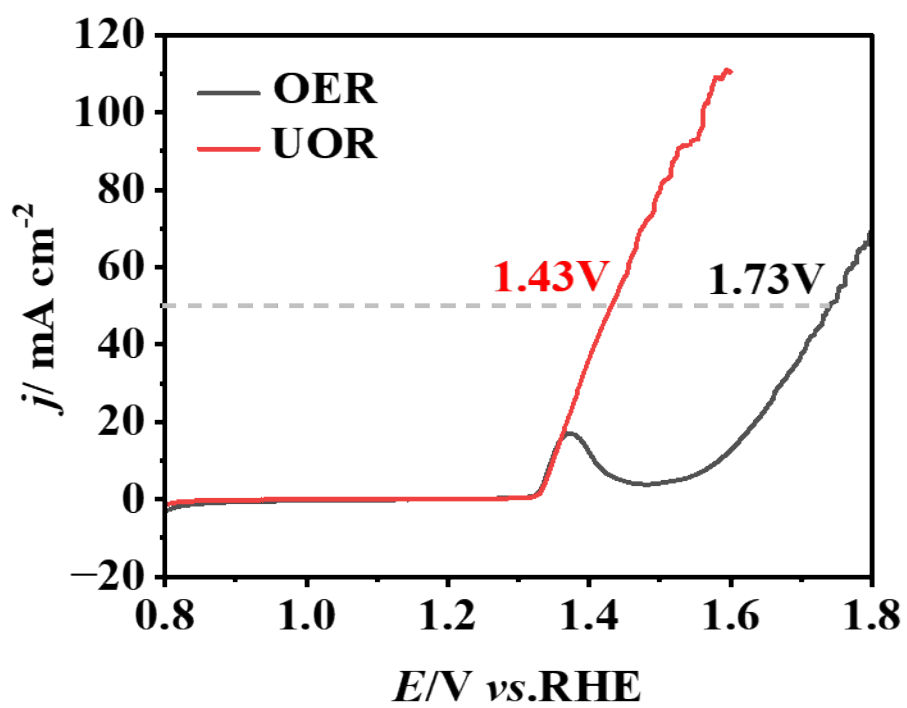

**Fig. S18** Polarization curves for the UOR and OER of Cl<sub>32</sub>-Ni(OH)<sub>2</sub> electrode

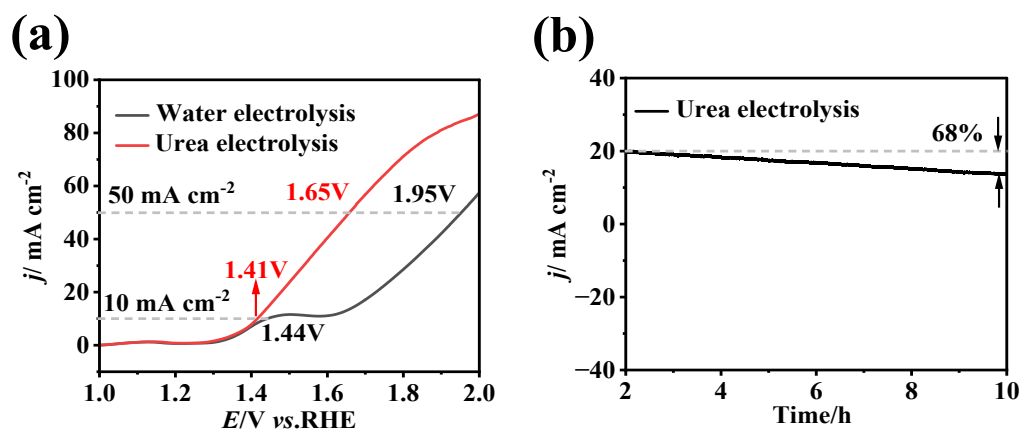

**Fig. S19** (a) Comparison of polarization curves for the urea electrolysis and water electrolysis using  $\text{Ni}(\text{OH})_2/\text{CC}$  as the anode and the  $\text{Pt}/\text{C}/\text{CC}$  as the cathode. (b) The chronoamperometric curve of  $\text{Cl}_{32}\text{-Ni}(\text{OH})_2/\text{CC}$  in 1.0 M KOH with 0.33 M urea for 10 h

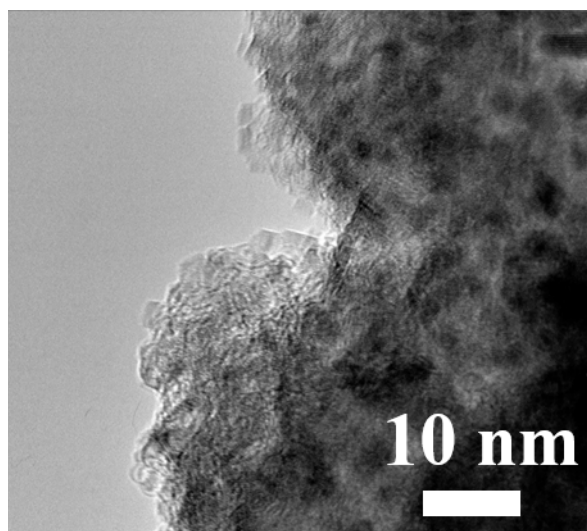

**Fig. S20** HRTEM image of Cl<sub>32</sub>-Ni(OH)<sub>2</sub> after 15 h durability test.

**Table S1.** The XPS binding energies of Ni 2p, Cl 2p, O 1s for Ni(OH)<sub>2</sub>, Cl<sub>32</sub>-Ni(OH)<sub>2</sub>.

| Sample                                | Ni 2p                                                                                                                                            | Cl 2p                                        | O 1s                                                                                   |
|---------------------------------------|--------------------------------------------------------------------------------------------------------------------------------------------------|----------------------------------------------|----------------------------------------------------------------------------------------|
| Ni(OH) <sub>2</sub>                   | 855.6 eV, 873.0 eV<br>(Ni <sup>2+</sup> )<br>861.40 eV, 879.45<br>eV (sat.)                                                                      | ---                                          | 530.75eV (M-O)<br>531.49eV (O Vac)<br>532.47 eV (H-O-H)                                |
| Cl <sub>32</sub> -Ni(OH) <sub>2</sub> | <b>855.60 eV, 872.90<br/>eV (Ni<sup>2+</sup>)</b><br><b>857.80 eV, 874.90<br/>eV (Ni<sup>3+</sup>)</b><br><b>861.53 eV, 879.46<br/>eV (sat.)</b> | <b>198.15 eV (Ni-Cl)</b><br><b>199.75 eV</b> | <b>530.50eV (M-O)</b><br><b>531.30eV (O<sub>Vac</sub>)</b><br><b>532.90 eV (H-O-H)</b> |

**Table S2.** Comparison of the UOR performance of catalysts reported in the literature.

| Catalysts                                   | Electrolyte                  | Potential (V vs.RHE) | Current density (mA cm <sup>-2</sup> ) | Substrate | Ref.             |
|---------------------------------------------|------------------------------|----------------------|----------------------------------------|-----------|------------------|
| <b>Cl<sub>32</sub>-Ni(OH)<sub>2</sub></b>   | <b>1 M KOH + 0.33 M urea</b> | <b>1.6</b>           | <b>106.15</b>                          | <b>GC</b> | <b>This work</b> |
| Ni <sub>60</sub> Cr <sub>40</sub> /C        | 1 M KOH + 0.33 M urea        | 1.6                  | ~90                                    | GC        | 1                |
| Ni MOF (BTC)                                | 1 M KOH + 0.33 M urea        | 1.6                  | ~89                                    | GC        | 2                |
| Ni-Co                                       | 1 M KOH + 0.33 M urea        | 1.6                  | ~21                                    | GC        | 3                |
| Ni(OH) <sub>2</sub> /PPy/GO                 | 1 M KOH + 0.5 M urea         | 1.6                  | ~13                                    | GC        | 4                |
| Metallic Ni(OH) <sub>2</sub>                | 1 M KOH + 0.33 M urea        | 1.52                 | ~35                                    | GC        | 5                |
| NiMn/C                                      | 1 M KOH + 0.33 M urea        | 1.6                  | ~42                                    | GC        | 6                |
| Ni/Sn dendrites                             | 1 M KOH + 0.33 M urea        | 1.55                 | ~44                                    | GC        | 7                |
| Ni-MOF @NiO/Ni-2                            | 1 M KOH + 0.33 M urea        | 1.6                  | ~80                                    | GC        | 8                |
| Ni <sub>2</sub> P                           | 1 M KOH + 0.5 M urea         | 1.6                  | ~90                                    | GC        | 9                |
| Ni(OH) <sub>2</sub> nanomeshes <sup>1</sup> | 1 M KOH + 0.33 M urea        | 1.6                  | ~45                                    | GC        | 10               |
| NiCo alloys                                 | 1 M KOH + 0.3 M urea         | 1.6                  | ~32                                    | GC        | 11               |

**Table S3.** Impedance parameter values obtained from the fitting to the equivalent circuit for the Nyquist plots in 1.0 M KOH and 0.33 M urea. The  $R_s$ ,  $R_1$  and  $R_{ct}$  correspond to the solution resistance, oxide film resistance and charge-transfer resistance, respectively.

| Sample                                    | $R_s$        | $R_1$        | $R_{ct}$     |
|-------------------------------------------|--------------|--------------|--------------|
| Ni(OH) <sub>2</sub>                       | 4.643        | 33.32        | 193.3        |
| Cl <sub>8</sub> -Ni(OH) <sub>2</sub>      | 4.932        | 7.878        | 56.09        |
| Cl <sub>16</sub> -Ni(OH) <sub>2</sub>     | 5.802        | 3.971        | 35.38        |
| Cl <sub>24</sub> -Ni(OH) <sub>2</sub>     | 4.618        | 1.967        | 25.13        |
| <b>Cl<sub>32</sub>-Ni(OH)<sub>2</sub></b> | <b>4.297</b> | <b>2.688</b> | <b>16.39</b> |
| Cl <sub>40</sub> -Ni(OH) <sub>2</sub>     | 4.228        | 5.702        | 37.67        |



**Table S4.** Comparison of the overall urea electrolysis performance of as-prepared Pt/C/CC||Cl<sub>32</sub>-Ni(OH)<sub>2</sub>/CC and recently reported active catalysts.

| Samples                                                                    | Electrolytes<br>(1 M KOH) | Voltage<br>(V@10 mA cm <sup>-2</sup><br>vs. RHE) | Ref.             |
|----------------------------------------------------------------------------|---------------------------|--------------------------------------------------|------------------|
| <b>Cl<sub>32</sub>-Ni(OH)<sub>2</sub>/CC  Pt/C/CC</b>                      | <b>+0.33 M Urea</b>       | <b>1.38</b>                                      | <b>This work</b> |
| NiFe/N-C  Pt                                                               | +1 M Urea                 | 1.50                                             | 12               |
| Ni <sub>x</sub> Co <sub>2-x</sub> P/C@HCNs/CC                              | +0.33 M Urea              | 1.47                                             | 13               |
| Co <sub>3</sub> Mo <sub>1</sub> S-CC  Co <sub>3</sub> Mo <sub>1</sub> S-CC | +0.5 M Urea               | 1.50                                             | 14               |
| Ni/C  Ni/C                                                                 | +0.33 M Urea              | 1.60                                             | 15               |
| Ni-MOF-0.5  Ni-MOF-0.5                                                     | +0.5 M Urea               | 1.52                                             | 16               |
| CoFeCr LDH/NF  Pt-C/NF                                                     | +0.33 M Urea              | 1.329                                            | 17               |
| Fe <sub>11.1%</sub> -Ni <sub>3</sub> S <sub>2</sub> /NF                    | + 0.33 M urea             | 1.46                                             | 18               |
| Ni <sub>2</sub> P/Fe <sub>2</sub> P/NF                                     | + 0.5 M urea              | 1.47                                             | 19               |
| Ni-MOF@NiO/Ni/NF  Pt-C/NF                                                  | + 0.33 M urea             | 1.42                                             | 8                |

## References

1. R. K. Singh and A. Schechter, *Chemcatchem*, 2017, **9**, 3374-3379.
2. V. Maruthapandian, S. Kumaraguru, S. Mohan, V. Saraswathy and S. Muralidharan, *Chemelectrochem*, 2018, **5**, 2795-2807.
3. W. Xu, H. M. Zhang, G. Li and Z. C. Wu, *Sci Rep-Uk*, 2014, **4**, 5863.
4. Z. Q. Cao, H. Mao, X. Guo, D. Y. Sun, Z. J. Sun, B. X. Wang, Y. Zhang and X. M. Song, *Acs Sustain Chem Eng*, 2018, **6**, 15570-15581.
5. X. J. Zhu, X. Y. Dou, J. Dai, X. D. An, Y. Q. Guo, L. D. Zhang, S. Tao, J. Y. Zhao, W. S. Chu, X. C. Zeng, C. Z. Wu and Y. Xie, *Angew Chem Int Edit*, 2016, **55**, 12465-12469.
6. N. A. M. Barakat, M. Alajami, Z. K. Ghouri and S. Al-Meer, *Nanomaterials-Basel*, 2018, **8**, 338.
7. R. K. Singh, P. Subramanian and A. Schechter, *Chemelectrochem*, 2017, **4**, 1037-1043.
8. Q. Li, S. S. Zheng, M. Du and H. Pang, *Chem Eng J*, 2021, **417**, 129201.
9. H. P. Liu, S. L. Zhu, Z. D. Cui, Z. Y. Li, S. L. Wu and Y. Q. Liang, *Nanoscale*, 2021, **13**, 1759-1769.
10. Y. Ding, Y. Li, Y. Y. Xue, B. Q. Miao, S. N. Li, Y. C. Jiang, X. Liu and Y. Chen, *Nanoscale*, 2019, **11**, 1058-1064.
11. W. Huang, K. L. Wang, Q. H. Cao, Y. J. Zhao, X. J. Sun, R. Ding, E. H. Liu, P. Gao and G. J. Li, *New J Chem*, 2021, **45**, 2943-2947.
12. J. Zhang, F. Xing, H. Zhang and Y. Huang, *Dalton Transactions*, 2020, **49**, 13962-13969.
13. S. Rezaee and S. Shahrokhian, *Nanoscale*, 2020, **12**, 16123-16135.
14. P. Li, Z. Zhuang, C. Du, D. Xiang, F. Zheng, Z. Zhang, Z. Fang, J. Guo, S. Zhu and W. Chen, *ACS Applied Materials & Interfaces*, 2020, **12**, 40194-40203.
15. L. Wang, L. Ren, X. Wang, X. Feng, J. Zhou and B. Wang, *ACS Applied Materials & Interfaces*, 2018, **10**, 4750-4756.
16. S. Zheng, Y. Zheng, H. Xue and H. Pang, *Chemical Engineering Journal*, 2020, **395**, 125166.
17. Z. Wang, W. Liu, Y. Hu, M. Guan, L. Xu, H. Li, J. Bao and H. Li, *Applied Catalysis B: Environmental*, 2020, **272**, 118959.
18. W. Zhu, Z. Yue, W. Zhang, N. Hu, Z. Luo, M. Ren, Z. Xu, Z. Wei, Y. Suo and J. Wang, *Journal of Materials Chemistry A*, 2018, **6**, 4346-4353.
19. L. Yan, Y. Sun, E. Hu, J. Ning, Y. Zhong, Z. Zhang and Y. Hu, *Journal of colloid and interface science*, 2019, **541**, 279-286.
